# Supplementary material for: Oat β-glucan and l-arabinose synergistically ameliorate glucose uptake in insulin-resistant HepG2 cells and exert anti-diabetic activity via activation of the PI3K/AKT pathway in db/db mice
Source: Royal Society of Chemistry journal article supplement (doi:10.1039/d2fo00889k), 2022-01-01
Supplement: d2fo00889k1.pdf [file d2fo00889k1.pdf]

1 Supplementary tables

2 Table s1

3 Sequences of primers used in quantitative real-time reverse transcription polymerase

4 chain reaction

| Genes          | Forward primer (5'-3') | Reverse primer (5'-3')  |
|----------------|------------------------|-------------------------|
| $\beta$ -actin | GGCTGTATTCCCCTCCATCG   | CCAGTTGGTAACAATGCCATGT  |
| IRS1           | GAGTTGAGTTGGGCAGAATAGG | CCTATCTGCATGGTCATGTAGT  |
| PI3K           | AAACAAAGCGGAGAACCTATTG | TAATGACGCAATGCTTGACTTC  |
| AKT            | TGCACAAACGAGGGGAATATAT | CGTTCCTTG TAGCCAATAAAGG |
| GLUT4          | TATTCAACCAGCATCTTCGAGT | GTCCAGCTCGTTCTACTAAGAG  |

5

6

7

8

9

10

11

12

13

14

15

16

17

18

19 Table s2

20 Content of commercial oat  $\beta$ -glucan and soluble oat  $\beta$ -glucan ( $\bar{x} \pm SD$ )

| Samples                        | Content (%)      |
|--------------------------------|------------------|
| Commercial oat $\beta$ -glucan | $69.63 \pm 0.31$ |
| Soluble oat $\beta$ -glucan    | $75.87 \pm 0.17$ |

21

22

23

24

25

26

27

28

29

30

31

32

33

34

35

36

37

38

## 39 Table s3

## 40 Criterion of NAFLD activity score

| Item                  | Definition                                                              | Score |
|-----------------------|-------------------------------------------------------------------------|-------|
| Steatosis Grade       | Low- to medium-power evaluation of parenchymal involvement by steatosis |       |
|                       | <5%                                                                     | 0     |
|                       | 5%-33%                                                                  | 1     |
|                       | >33%-66%                                                                | 2     |
|                       | >66%                                                                    | 3     |
| Lobular inflammation  | Overall assessment of all inflammatory foci                             |       |
|                       | No foci                                                                 | 0     |
|                       | <2                                                                      | 1     |
|                       | 2-4                                                                     | 2     |
|                       | >4                                                                      | 3     |
| Hepatocyte ballooning | None                                                                    | 0     |
|                       | Few balloon cells                                                       | 1     |
|                       | Many cells/prominent ballooning                                         | 2     |

42 The raw data for all figures are as follows.

43 Figure 1

44 The effect of OBG on HepG2 cell viability.

| OBG concentration (mg/mL) | Control | 0.625         | 1.25           | 2.5          | 5            | 10           |
|---------------------------|---------|---------------|----------------|--------------|--------------|--------------|
| HepG2 cell viability (%)  | 100     | 105.36 ± 2.91 | 104.88 ± 10.79 | 93.27 ± 5.00 | 93.52 ± 6.09 | 89.70 ± 4.51 |

45

46 The effect of LA on HepG2 cell viability.

| LA concentration (mg/mL) | Control | 0.625         | 1.25         | 2.5          | 5            | 10           |
|--------------------------|---------|---------------|--------------|--------------|--------------|--------------|
| HepG2 cell viability (%) | 100     | 101.02 ± 2.81 | 98.24 ± 7.01 | 96.54 ± 5.99 | 92.11 ± 4.83 | 71.41 ± 8.68 |

47

48 The effect of DEX on HepG2 cell viability.

| DEX concentration (µM)   | Control | 0.25         | 0.5          | 1            | 2            | 4            | 8            |
|--------------------------|---------|--------------|--------------|--------------|--------------|--------------|--------------|
| HepG2 cell viability (%) | 100     | 90.68 ± 4.64 | 89.20 ± 7.80 | 86.84 ± 9.23 | 92.04 ± 8.95 | 79.24 ± 5.39 | 19.24 ± 4.61 |

49

50

51

52

53

54

55

56

57 Figure 2

58 The effect of different DEX concentrations and induction time on difference value of  
59 glucose consumption.

| DEX concentration<br>( $\mu\text{M}$ ) | Difference value of glucose consumption (mM) |                 |                 |
|----------------------------------------|----------------------------------------------|-----------------|-----------------|
|                                        | 12 h                                         | 24 h            | 48 h            |
| 0.25                                   | $0.29 \pm 0.06$                              | $0.52 \pm 0.09$ | $1.20 \pm 0.42$ |
| 0.50                                   | $0.36 \pm 0.04$                              | $0.56 \pm 0.09$ | $1.32 \pm 0.12$ |
| 1                                      | $0.47 \pm 0.06$                              | $0.97 \pm 0.07$ | $1.31 \pm 0.04$ |
| 2                                      | $1.12 \pm 0.03$                              | $1.22 \pm 0.15$ | $1.64 \pm 0.08$ |
| 4                                      | $1.29 \pm 0.12$                              | $1.48 \pm 0.28$ | $2.01 \pm 0.36$ |

60

61

62

63

64

65

66

67

68

69

70

71

72

73 Figure 3

74 The effect of OBG, LA, and different compositions on glucose consumption in insulin  
75 resistance HepG2 cell model.

| Groups | Glucose content (mM) |
|--------|----------------------|
| CN     | 18.09 ± 0.20         |
| OBG    | 14.36 ± 0.14         |
| LA     | 14.72 ± 0.13         |
| 1:1    | 12.99 ± 0.45         |
| 1:2    | 14.82 ± 0.04         |
| 1:4    | 14.82 ± 0.63         |
| 1:6    | 14.59 ± 1.08         |
| 1:8    | 14.79 ± 0.64         |
| 1:10   | 14.24 ± 0.51         |
| 2:1    | 14.11 ± 0.32         |
| 4:1    | 13.59 ± 0.16         |
| 6:1    | 14.04 ± 0.19         |
| 8:1    | 14.57 ± 0.24         |
| 10:1   | 15.31 ± 1.09         |

76

77

78

79

80

81

82

83

84 Figure 4

85 The effect of OBG:LA = 1:1 on body weight in db/db mice.

| Weeks | Groups       |              |              |              |              |              |
|-------|--------------|--------------|--------------|--------------|--------------|--------------|
|       | CN           | NEG          | MET          | 1:1          | OBG          | LA           |
| 0     | 20.35 ± 0.61 | 37.17 ± 0.85 | 38.72 ± 0.96 | 35.76 ± 1.02 | 35.43 ± 0.30 | 35.57 ± 2.01 |
| 1     | 22.21 ± 0.19 | 42.85 ± 1.05 | 43.16 ± 0.80 | 42.47 ± 2.00 | 41.54 ± 0.62 | 42.23 ± 1.82 |
| 2     | 23.21 ± 0.88 | 45.91 ± 0.65 | 44.45 ± 1.41 | 44.58 ± 2.39 | 43.22 ± 1.30 | 43.65 ± 2.11 |
| 3     | 24.61 ± 1.29 | 45.22 ± 0.74 | 42.72 ± 1.88 | 42.13 ± 0.87 | 40.93 ± 2.74 | 42.33 ± 1.00 |
| 4     | 25.38 ± 0.96 | 48.25 ± 1.86 | 42.73 ± 1.55 | 43.14 ± 0.61 | 42.03 ± 4.12 | 43.14 ± 0.82 |
| 5     | 25.05 ± 0.74 | 52.04 ± 2.46 | 44.93 ± 2.07 | 46.04 ± 1.42 | 44.62 ± 5.23 | 44.71 ± 1.58 |
| 6     | 24.96 ± 0.96 | 53.09 ± 3.14 | 45.49 ± 1.28 | 46.70 ± 1.07 | 45.86 ± 4.60 | 45.49 ± 2.33 |
| 7     | 25.07 ± 0.71 | 53.80 ± 3.72 | 45.10 ± 1.19 | 46.03 ± 2.96 | 45.87 ± 4.80 | 45.59 ± 2.53 |
| 8     | 25.83 ± 1.21 | 56.08 ± 3.36 | 45.36 ± 1.08 | 46.30 ± 3.15 | 46.99 ± 4.65 | 46.48 ± 2.84 |
| 9     | 25.89 ± 1.35 | 57.81 ± 4.34 | 44.10 ± 0.89 | 46.56 ± 3.36 | 47.70 ± 4.73 | 47.86 ± 2.41 |
| 10    | 25.57 ± 0.69 | 57.50 ± 4.04 | 44.10 ± 0.86 | 46.72 ± 3.14 | 48.00 ± 4.65 | 48.26 ± 2.66 |

86

87 The effect of OBG:LA = 1:1 on Lee's index in db/db mice.

| Groups                           | CN              | NEG               | MET              | 1:1              | OBG               | LA               |
|----------------------------------|-----------------|-------------------|------------------|------------------|-------------------|------------------|
| Lee's index (cm/g <sup>3</sup> ) | 81.87 ±<br>3.74 | 170.95 ±<br>15.49 | 152.84 ±<br>6.24 | 153.32 ±<br>4.09 | 159.91 ±<br>14.05 | 155.49 ±<br>5.96 |

88

89 The effect of OBG:LA = 1:1 on liver index in db/db mice.

| Groups             | CN              | NEG             | MET             | 1:1             | OBG             | LA              |
|--------------------|-----------------|-----------------|-----------------|-----------------|-----------------|-----------------|
| liver index (mg/g) | 37.03 ±<br>0.73 | 50.23 ±<br>1.16 | 46.03 ±<br>2.08 | 46.19 ±<br>1.81 | 48.84 ±<br>0.97 | 49.15 ±<br>0.35 |

90

91

92 Figure 5

93 The effect of OBG:LA = 1:1 on fasting blood glucose (FBG) in db/db mice.

| Groups       | CN             | NEG             | MET             | 1:1             | OBG             | LA              |
|--------------|----------------|-----------------|-----------------|-----------------|-----------------|-----------------|
| FBG (mmol/L) | 4.46 ±<br>0.36 | 33.73 ±<br>2.46 | 27.85 ±<br>2.31 | 27.14 ±<br>2.15 | 28.91 ±<br>1.24 | 27.80 ±<br>1.45 |

94

95 The effect of OBG:LA = 1:1 on glyated serum proteins (GSP) in db/db mice.

| Groups       | CN             | NEG            | MET            | 1:1            | OBG            | LA             |
|--------------|----------------|----------------|----------------|----------------|----------------|----------------|
| GSP (mmol/L) | 1.75 ±<br>0.16 | 3.46 ±<br>0.80 | 2.41 ±<br>0.22 | 2.49 ±<br>0.11 | 2.60 ±<br>0.25 | 2.95 ±<br>0.30 |

96

97 The effect of OBG:LA = 1:1 on fasting blood insulin (FINS) in db/db mice.

| Groups       | CN             | NEG             | MET             | 1:1             | OBG             | LA              |
|--------------|----------------|-----------------|-----------------|-----------------|-----------------|-----------------|
| FINS (mIU/L) | 8.72 ±<br>0.65 | 17.60 ±<br>1.04 | 13.90 ±<br>0.28 | 11.79 ±<br>0.93 | 12.71 ±<br>1.21 | 14.52 ±<br>1.34 |

98

99 The effect of OBG:LA = 1:1 on HOMA-IR index in db/db mice.

| Groups  | CN             | NEG             | MET             | 1:1             | OBG             | LA              |
|---------|----------------|-----------------|-----------------|-----------------|-----------------|-----------------|
| HOMA-IR | 1.74 ±<br>0.26 | 26.33 ±<br>1.60 | 17.21 ±<br>1.57 | 14.23 ±<br>1.67 | 16.36 ±<br>2.09 | 17.88 ±<br>0.71 |

100

101

102



103 The effect of OBG:LA = 1:1 on glucose tolerance in db/db mice fasted for 12 h

104 determined by the OGTT.

| Time (min) | Groups  |         |         |         |         |         |
|------------|---------|---------|---------|---------|---------|---------|
|            | CN      | NEG     | MET     | 1:1     | OBG     | LA      |
| 0          | 4.95 ±  | 29.58 ± | 18.84 ± | 21.36 ± | 23.26 ± | 24.74 ± |
|            | 0.76    | 2.61    | 1.19    | 0.77    | 3.03    | 1.34    |
| 30         | 18.60 ± | 32.33 ± | 33.05 ± | 33.30 ± | 33.15 ± | 31.93 ± |
|            | 3.69    | 1.47    | 0.50    | 1.21    | 0.30    | 2.75    |
| 60         | 10.18 ± | 31.60 ± | 28.90 ± | 29.95 ± | 31.10 ± | 30.35 ± |
|            | 2.10    | 1.43    | 2.86    | 1.87    | 1.15    | 2.93    |
| 90         | 7.83 ±  | 30.15 ± | 25.43 ± | 24.85 ± | 27.88 ± | 27.35 ± |
|            | 2.17    | 1.87    | 3.22    | 1.88    | 1.63    | 1.58    |
| 120        | 5.65 ±  | 29.18 ± | 20.13 ± | 23.20 ± | 22.25 ± | 25.58 ± |
|            | 0.06    | 2.37    | 0.87    | 1.87    | 5.81    | 2.45    |

105

106 AUC for the OGTT test.

| Groups      | CN        | NEG       | MET       | 1:1       | OBG       | LA        |
|-------------|-----------|-----------|-----------|-----------|-----------|-----------|
| Glucose AUC | 1259.63 ± | 3710.66 ± | 3178.28 ± | 3363.11 ± | 3410.44 ± | 3461.89 ± |
|             | 112.61    | 213.01    | 111.87    | 109.36    | 180.07    | 279.65    |

107

108

109

110

111

112

113

114

115

116 Figure 6

117 NAFLD activity score of liver tissue.

| Item                     | Groups |                |                |                |                |                |
|--------------------------|--------|----------------|----------------|----------------|----------------|----------------|
|                          | CN     | NEG            | MET            | 1:1            | OBG            | LA             |
| Steatosis Grade          | 0      | 2.17 ±<br>0.75 | 1.00 ±<br>0.41 | 1.17 ±<br>0.63 | 1.50 ±<br>0.54 | 1.83 ±<br>0.75 |
| Lobular<br>inflammation  | 0      | 1.53 ±<br>0.75 | 0.83 ±<br>0.52 | 1.00 ±<br>0.63 | 1.07 ±<br>0.75 | 1.23 ±<br>0.75 |
| Hepatocyte<br>ballooning | 0      | 1.47 ±<br>0.52 | 1.00 ±<br>0.63 | 0.83 ±<br>0.52 | 1.13 ±<br>0.75 | 1.20 ±<br>0.55 |

118

119

120

121

122

123

124

125

126

127

128

129

130

131

132

133 Figure 7

134 Effect of OBG:LA = 1:1 on the expression of genes in the liver of db/db mice.

| Genes | Groups |        |        |        |        |        |
|-------|--------|--------|--------|--------|--------|--------|
|       | CN     | NEG    | MET    | 1:1    | OBG    | LA     |
| IRS1  | 1.03 ± | 0.35 ± | 0.75 ± | 0.59 ± | 0.40 ± | 0.51 ± |
|       | 0.13   | 0.06   | 0.07   | 0.10   | 0.07   | 0.06   |
| PI3K  | 1.01 ± | 0.15 ± | 0.95 ± | 0.62 ± | 0.52 ± | 0.68 ± |
|       | 0.10   | 0.05   | 0.09   | 0.05   | 0.05   | 0.09   |
| AKT   | 1.03 ± | 0.16 ± | 0.97 ± | 0.93 ± | 0.43 ± | 0.57 ± |
|       | 0.07   | 0.04   | 0.06   | 0.08   | 0.05   | 0.16   |
| GLUT4 | 1.03 ± | 0.37 ± | 0.99 ± | 0.62 ± | 0.84 ± | 0.36 ± |
|       | 0.05   | 0.06   | 0.15   | 0.13   | 0.11   | 0.05   |

135

136

137

138

139

140

141

142

143

144

145

146

147 Figure 8

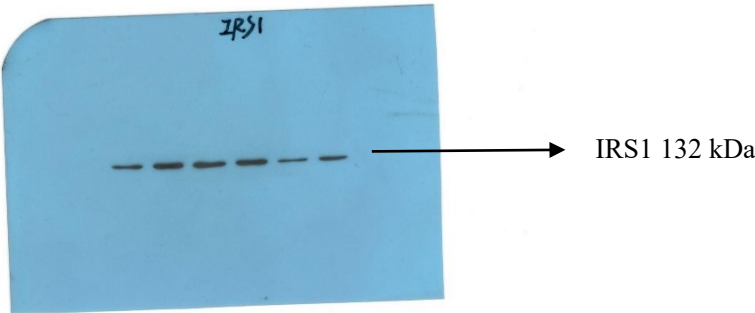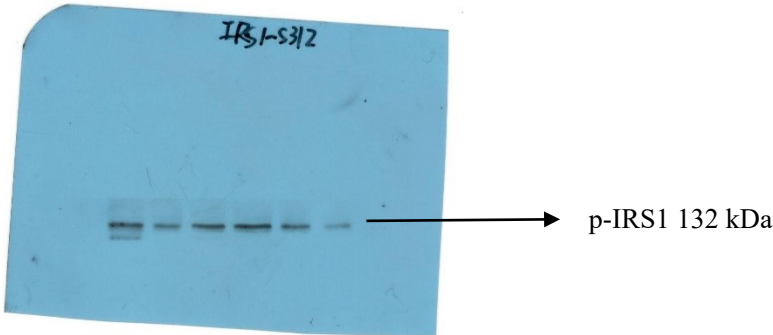

148

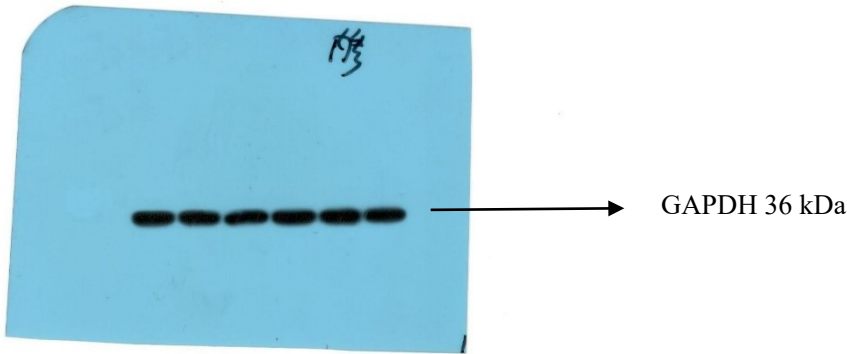

149

150

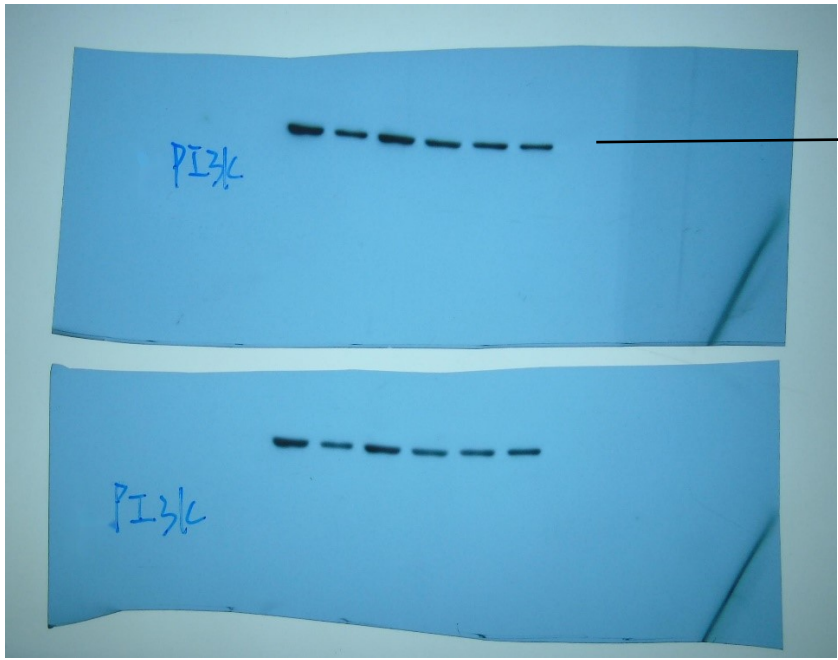

151

152

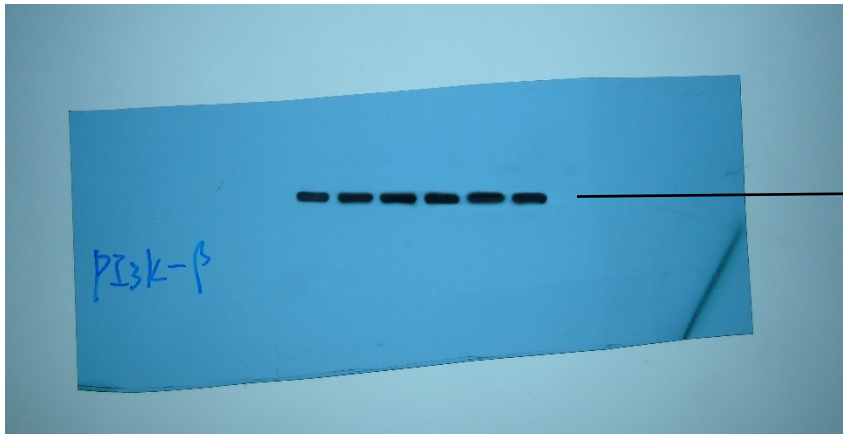

153

154

155

156

157

158

159

160

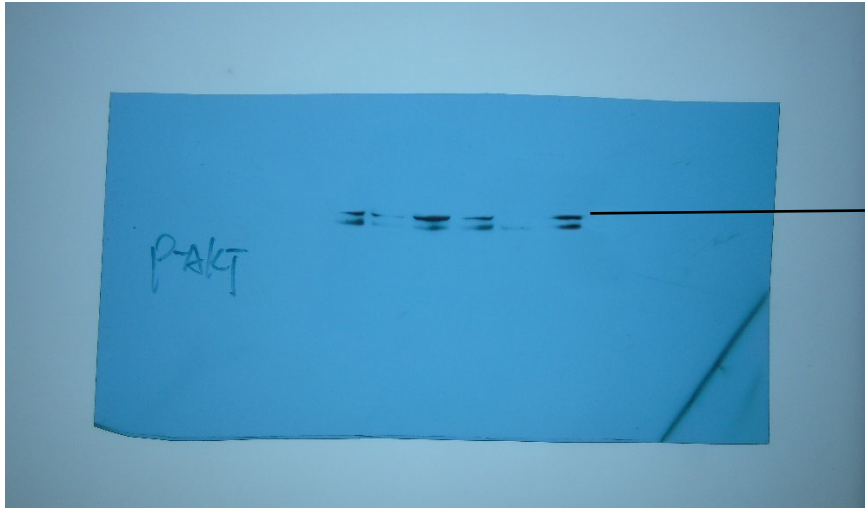

161

162

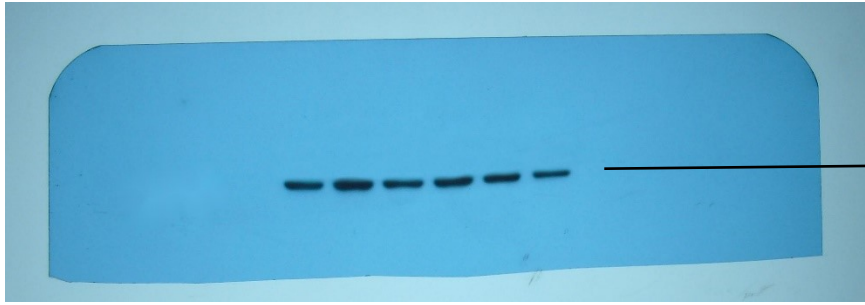

163

164

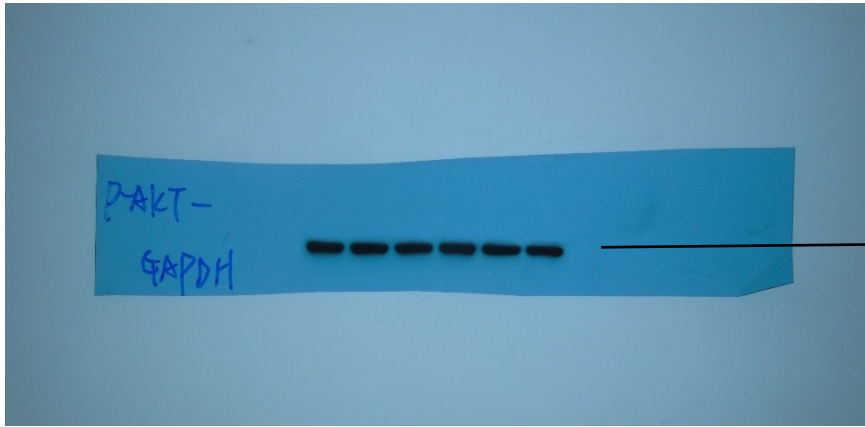

165

166

167

168

169

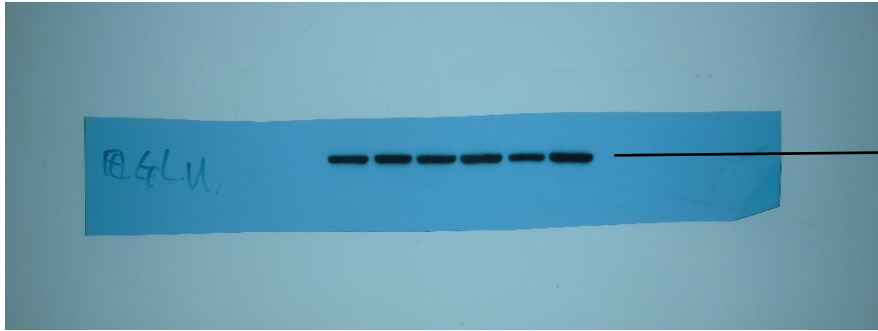

170

171

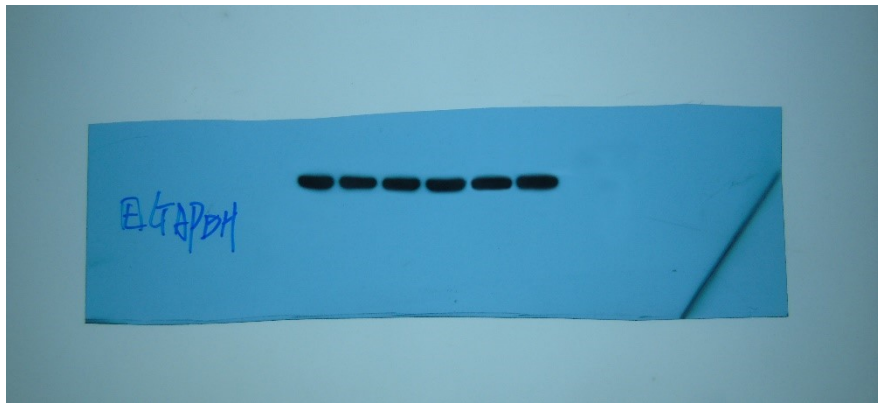

172
